# Supplementary material
Source: PubMed Central journal article supplement (PMC3961547)
Supplement: NIHMS551906-supplement-01.pdf [file NIHMS551906-supplement-01.pdf]

## Supplementary Materials

Supplementary Table 1: AD-associated genes based on a FDR 10% cutoff and the most-significant SNP responsible for the identification of the gene as AD-related.

| GENE        | Most-significant SNP within 5 kb |     |             |           | nSNP | EFFn | p <sub>corrected</sub> | FDR       |
|-------------|----------------------------------|-----|-------------|-----------|------|------|------------------------|-----------|
|             | rsID                             | CHR | bp          | p-value   |      |      |                        |           |
| APOC1       | rs4420638                        | 19  | 45,422,946  | <1E-300   | 4    | 4    | <1E-300                | <1E-300   |
| TOMM40      | rs6857                           | 19  | 45,392,254  | 2.03E-200 | 9    | 5    | 1.02E-199              | 1.63E-195 |
| PVRL2       | rs6857                           | 19  | 45,392,254  | 2.03E-200 | 39   | 14   | 2.84E-199              | 3.04E-195 |
| APOE        | rs10119                          | 19  | 45,406,673  | 6.24E-125 | 5    | 4    | 2.50E-124              | 2.00E-120 |
| BCAM        | rs10402271                       | 19  | 45,329,214  | 8.72E-44  | 8    | 6    | 5.23E-43               | 3.36E-39  |
| EIF5AP3     | rs1114832                        | 19  | 45,636,201  | 3.21E-18  | 4    | 2    | 6.41E-18               | 3.43E-14  |
| LRR68       | rs1114832                        | 19  | 45,636,201  | 3.21E-18  | 34   | 7    | 2.24E-17               | 1.03E-13  |
| NKPD1       | rs1048699                        | 19  | 45,650,386  | 6.15E-18  | 7    | 5    | 3.07E-17               | 1.23E-13  |
| BCL3        | rs8100239                        | 19  | 45,253,104  | 2.01E-14  | 3    | 3    | 6.03E-14               | 2.15E-10  |
| MS4A4A      | rs10792263                       | 11  | 60,079,651  | 2.88E-11  | 38   | 9    | 2.59E-10               | 8.33E-07  |
| MS4A6E      | rs4939338                        | 11  | 60,099,225  | 2.58E-11  | 44   | 13   | 3.35E-10               | 9.76E-07  |
| CLPTM1      | rs16979595                       | 19  | 45,477,381  | 8.47E-10  | 31   | 5    | 4.23E-09               | 1.13E-05  |
| CR1         | rs6656401                        | 1   | 207,692,049 | 3.41E-10  | 80   | 17   | 5.79E-09               | 1.43E-05  |
| EXOC3L2     | rs10415983                       | 19  | 45,711,598  | 1.26E-09  | 18   | 6    | 7.55E-09               | 1.73E-05  |
| MS4A4E      | rs1426250                        | 11  | 60,001,325  | 1.75E-09  | 50   | 6    | 1.05E-08               | 2.25E-05  |
| MS4A6A      | rs17602572                       | 11  | 59,948,374  | 4.09E-09  | 15   | 3    | 1.23E-08               | 2.46E-05  |
| PICALM      | rs669813                         | 11  | 85,762,244  | 1.37E-09  | 126  | 17   | 2.33E-08               | 4.41E-05  |
| RELB        | rs10424046                       | 19  | 45,536,036  | 6.25E-08  | 8    | 4    | 2.50E-07               | 4.43E-04  |
| CLASRP      | rs1560725                        | 19  | 45,543,787  | 1.31E-07  | 10   | 2    | 2.63E-07               | 4.43E-04  |
| APOC2       | rs5167                           | 19  | 45,448,465  | 1.28E-07  | 15   | 4    | 5.12E-07               | 7.47E-04  |
| APOC4       | rs5167                           | 19  | 45,448,465  | 1.28E-07  | 11   | 4    | 5.12E-07               | 7.47E-04  |
| APOC4-APOC2 | rs5167                           | 19  | 45,448,465  | 1.28E-07  | 15   | 4    | 5.12E-07               | 7.47E-04  |
| CD33        | rs3865444                        | 19  | 51,727,962  | 1.07E-07  | 18   | 7    | 7.47E-07               | 1.04E-03  |
| MIR4531     | rs203709                         | 19  | 45,161,566  | 4.52E-07  | 4    | 2    | 9.04E-07               | 1.18E-03  |
| CLU         | rs1532278                        | 8   | 27,466,315  | 8.34E-08  | 25   | 11   | 9.17E-07               | 1.18E-03  |
| PVR         | rs7255066                        | 19  | 45,146,103  | 1.80E-07  | 11   | 6    | 1.08E-06               | 1.33E-03  |
| MS4A2       | rs2847655                        | 11  | 59,865,671  | 2.35E-07  | 28   | 7    | 1.65E-06               | 1.96E-03  |
| EPHA1       | rs11767557                       | 7   | 143,109,139 | 2.43E-07  | 16   | 9    | 2.19E-06               | 2.51E-03  |
| LOC285965   | rs11767557                       | 7   | 143,109,139 | 2.43E-07  | 129  | 20   | 4.86E-06               | 5.38E-03  |
| ABCA7       | rs3752246                        | 19  | 1,056,492   | 5.79E-07  | 27   | 10   | 5.79E-06               | 6.19E-03  |
| GEMIN7      | rs7250924                        | 19  | 45,585,706  | 2.08E-06  | 5    | 3    | 6.25E-06               | 6.46E-03  |

rsID—SNP ID for the most significant SNP in or near the gene; CHR—chromosome; bp—HG 19 base-pair position; p-value—significance of the most-significant SNP within or near the gene; nSNP—The number of SNPs examined within 5 kb of the gene; EFFn—The effective number of independent tests as calculated using the Li and Ji method; p<sub>corrected</sub>—The gene-level significance which has been corrected for EFFn; FDR—the Benjamini Hochberg false discovery rate for the gene.

Continued on next page.

Supplementary Table 1: Continued

| GENE         | Most-significant SNP within 5 kb |     |             |           | nSNP | EFFn | p <sub>corrected</sub> | FDR      |
|--------------|----------------------------------|-----|-------------|-----------|------|------|------------------------|----------|
|              | rsID                             | CHR | bp          | p-value   |      |      |                        |          |
| SIGLEC22P    | rs3852865                        | 19  | 51,714,065  | 1.35E-06  | 15   | 5    | 6.76E-06               | 6.78E-03 |
| PTK2B        | rs17447007                       | 8   | 27,230,637  | 3.56E-07  | 200  | 26   | 9.25E-06               | 9.00E-03 |
| BLOC1S3      | rs12460041                       | 19  | 45,677,315  | 5.53E-06  | 3    | 2    | 1.11E-05               | 0.010    |
| LOC100421517 | rs2396825                        | 6   | 47,568,696  | 2.22E-06  | 9    | 5    | 1.11E-05               | 0.010    |
| CD2AP        | rs9349407                        | 6   | 47,453,378  | 1.03E-06  | 116  | 13   | 1.34E-05               | 0.012    |
| TRAPPC6A     | rs12460041                       | 19  | 45,677,315  | 5.53E-06  | 6    | 3    | 1.66E-05               | 0.014    |
| HBEGF        | rs2282802                        | 5   | 139,712,239 | 3.05E-06  | 19   | 6    | 1.83E-05               | 0.015    |
| CEACAM16     | rs2965164                        | 19  | 45,202,052  | 3.08E-06  | 12   | 7    | 2.16E-05               | 0.018    |
| YWHAZP9      | rs558678                         | 11  | 59,852,113  | 7.19E-06  | 13   | 4    | 2.87E-05               | 0.023    |
| MIR142       | rs2632516                        | 17  | 56,409,089  | 1.15E-05  | 5    | 3    | 3.45E-05               | 0.027    |
| SORL1        | rs1792124                        | 11  | 121,441,520 | 1.29E-06  | 155  | 30   | 3.88E-05               | 0.030    |
| LOC100289298 | rs1476679                        | 7   | 100,004,446 | 2.02E-05  | 5    | 2    | 4.05E-05               | 0.030    |
| MS4A3        | rs528823                         | 11  | 59,837,097  | 8.80E-06  | 22   | 5    | 4.40E-05               | 0.032    |
| MTSS1L       | rs4985556                        | 16  | 70,694,000  | 7.44E-06  | 16   | 7    | 5.20E-05               | 0.037    |
| MIR4736      | rs2632516                        | 17  | 56,409,089  | 1.15E-05  | 6    | 5    | 5.75E-05               | 0.040    |
| IL34         | rs4985556                        | 16  | 70,694,000  | 7.44E-06  | 43   | 8    | 5.95E-05               | 0.041    |
| CEACAM19     | rs2289494                        | 19  | 45,186,965  | 1.28E-05  | 12   | 5    | 6.39E-05               | 0.043    |
| BIN1         | rs1060743                        | 2   | 127,826,533 | 4.85E-06  | 85   | 15   | 7.27E-05               | 0.048    |
| LOC100506779 | rs2526380                        | 17  | 56,398,006  | 8.23E-06  | 21   | 9    | 7.41E-05               | 0.048    |
| BZRAP1       | rs2526380                        | 17  | 56,398,006  | 8.23E-06  | 35   | 10   | 8.23E-05               | 0.052    |
| CCDC116      | rs5754467                        | 22  | 21,985,094  | 2.25E-05  | 8    | 4    | 8.98E-05               | 0.054    |
| YDJC         | rs5754467                        | 22  | 21,985,094  | 2.25E-05  | 11   | 4    | 8.98E-05               | 0.054    |
| PILRA        | rs2405442                        | 7   | 99,971,313  | 3.25E-05  | 11   | 3    | 9.74E-05               | 0.058    |
| ZCWPW1       | rs1476679                        | 7   | 100,004,446 | 2.02E-05  | 13   | 6    | 1.21E-04               | 0.071    |
| REPIN1       | rs4725336                        | 7   | 150,067,445 | 3.11E-05  | 10   | 4    | 1.24E-04               | 0.071    |
| ZNF296       | rs3786509                        | 19  | 45,570,051  | 0.0001553 | 1    | 1    | 1.55E-04               | 0.087    |
| SPPL2A       | rs12440864                       | 15  | 51,005,957  | 2.12E-05  | 51   | 8    | 1.70E-04               | 0.094    |
| CCDC83       | rs7927222                        | 11  | 85,627,108  | 1.47E-05  | 67   | 12   | 1.76E-04               | 0.096    |

rsID—SNP ID for the most significant SNP in or near the gene; CHR—chromosome; bp—HG 19 base-pair position; p-value—significance of the most-significant SNP within or near the gene; nSNP—The number of SNPs examined within 5 kb of the gene; EFFn—The effective number of independent tests as calculated using the Li and Ji method; p<sub>corrected</sub>—The gene-level significance based on the peak SNP significance corrected for EFFn; FDR—the Benjamini Hochberg false discovery rate for the gene.

Supplementary Table 2: Genes significantly associated with AD according to the AlzGene database (<http://www.alzgene.org>).

|        |              |            |
|--------|--------------|------------|
| ABCA7  | DAPK1        | MS4A6A     |
| ACE    | ECE1         | MTHFR      |
| ADAM10 | ENTPD7       | NEDD9      |
| APOC1  | EPHA1        | OTC        |
| APOC4  | EXOC3L2      | PCDH11X    |
| APOE   | GAB2         | PGBD1      |
| ARID5B | GAPDHS       | PICALM     |
| BCAM   | GRN          | PRNP       |
| BIN1   | GWA_14q32.13 | PVRL2      |
| CALHM1 | IDE          | SORCS1     |
| CCR2   | IL1A         | SORL1      |
| CD2AP  | IL1B         | TF         |
| CD33   | IL33         | TFAM       |
| CH25H  | IL8          | THRA       |
| CHRNA2 | LDLR         | TNF        |
| CLU    | LOC439999    | TNK1       |
| CR1    | LOC651924    | TOMM40     |
| CST3   | MS4A4E       | hCG2039140 |
